# Supplementary material
Source: PubMed Central journal article supplement (PMC3325719)
Supplement: 1118699109_Appendix.pdf [file 1118699109_Appendix.pdf]

## Supporting Information

# **Structure of a hepatitis C virus RNA domain in complex with a translation inhibitor reveals a binding mode reminiscent of riboswitches**

Sergey M. Dibrov, Kejia Ding, Nicholas D. Brunn, Matthew A. Parker, B. Mikael Bergdahl, David L. Wyles, and Thomas Hermann

**Compound Synthesis.** The methyl analog **3**, which served as an inactive control compound, was obtained in two steps from the published intermediate **4** (1):

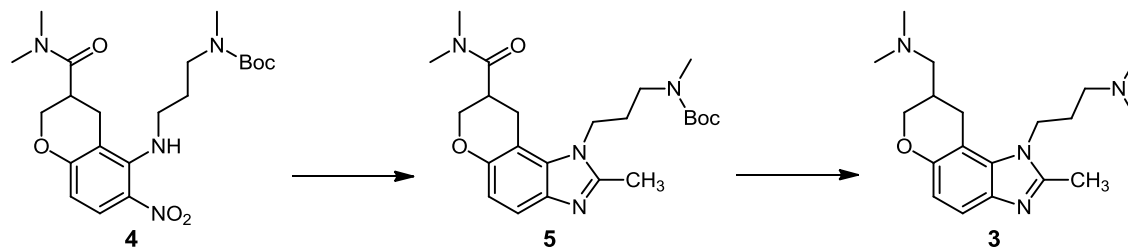

*tert*-Butyl-*N*-[3-[8-(dimethylcarbamoyl)-2-methyl-8,9-dihydro-7*H*-pyrano[2,3-*g*]benzimidazol-1-yl]-propyl]-*N*-methylcarbamate (**5**). To a flask containing 10% palladium on carbon (315 mg) was added a solution of **4** (350 mg, 0.80 mmol) in absolute ethanol (35 mL). The mixture was stirred for 90 minutes under 1 atm of H<sub>2</sub> at room temperature, at which point <sup>1</sup>H-NMR analysis showed complete reduction to the corresponding aniline derivative. The mixture was filtered through Celite. The Celite was washed with ethanol (3 x 10 mL) and all filtrates were combined. To this solution was added ethyl acetimidate hydrochloride (117 mg, 0.95 mmol) and the mixture was stirred at room temperature for 24 hours under argon. The solvent was evaporated, and the residue was partitioned between CH<sub>2</sub>Cl<sub>2</sub> (50 mL) and 10% aq. K<sub>2</sub>CO<sub>3</sub> (50 mL). The CH<sub>2</sub>Cl<sub>2</sub> phase was separated, dried with Na<sub>2</sub>SO<sub>4</sub>, and evaporated. The residue was purified on silica using a gradient of 0–65% 2-propanol in ethyl acetate containing 1% triethylamine, giving 288 mg (83%) of **2** as a light tan oil that solidified into a beige crystalline solid. <sup>1</sup>H NMR (400 MHz, CDCl<sub>3</sub>) δ 7.41 (d, Ar-*H*, *J* = 8.7 Hz, 1H), 6.77 (d, Ar-*H*, *J* = 8.7 Hz, 1H), 4.39 (m, OCH<sub>2</sub>CH, 1H), 4.22 (t, NCH<sub>2</sub>CH<sub>2</sub>, *J* = 8.0 Hz, 2H), 4.00 (dd, OCH<sub>2</sub>CH, *J* = 10.6, 10.6 Hz, 1H), 3.51 (m, CHCONMe<sub>2</sub>, 1H), 3.70-3.25 (m, ArCH<sub>2</sub>CH, 2H), 3.26 (m, partly hidden, NCH<sub>2</sub>, 1H), 3.21 (m,

partly hidden, NCH<sub>2</sub>, 1H), 3.19, 3.04, 2.87, 2.54 (4s, CH<sub>3</sub>, 3H each), 2.06-1.86 (m, CH<sub>2</sub>CH<sub>2</sub>CH<sub>2</sub>, 2H), 1.45 (s, *t*-Bu, 9H). ESI-MS (M+H)<sup>+</sup>: 431.4.

**8-(Dimethylaminomethyl)-1-(3-dimethylaminopropyl)-2-methyl-8,9-dihydro-7H-pyrano[3,2-*e*]benzimidazole (3).** Compound **5** (200 mg, 0.47 mmol) was dissolved in THF (10 mL) under argon. Lithium aluminum hydride (660 mg, 17 mmol) was added and the mixture was stirred at 60 °C for 1.5 hours. The mixture was cooled to room temperature and diluted with anhydrous ether (15 mL), then quenched by careful dropwise sequential addition of 2-propanol (0.5 mL), 15% aq. NaOH (0.5 mL), and water (1.7 mL). The solids were removed by filtration and washed with anhydrous ether (3 x 15 mL). The filtrate and washings were combined, dried with Na<sub>2</sub>SO<sub>4</sub>, and evaporated to give the crude product (140 mg, 91%) as a colorless oil. <sup>1</sup>H NMR (400 MHz, CDCl<sub>3</sub>) δ 7.38 (d, Ar-*H*, *J* = 8.6 Hz, 1H), 7.00 (d, Ar-*H*, *J* = 8.6 Hz, 1H), 4.29 (m, partly hidden, OCH<sub>2</sub>CH, 1H), 4.27 (t, NCH<sub>2</sub>CH<sub>2</sub>, *J* = 7.7 Hz, 2H), 3.86 (dd, OCH<sub>2</sub>CH, *J* = 10.6, 7.0 Hz, 1H), 3.25 (dd, ArCH<sub>2</sub>CH, *J* = 15.8, 4.7 Hz, 1H), 2.86 (dd, ArCH<sub>2</sub>CH, *J* = 15.8, 7.0 Hz, 1H), 2.56 (s, CCH<sub>3</sub>, 3H), 2.32-2.28 (2m, partly hidden, 2 x NCH<sub>2</sub>, 2H each), 2.28 (m, OCH<sub>2</sub>CH, 1H), 2.25, 2.24 (2s, N(CH<sub>3</sub>)<sub>2</sub>, 6H each), 1.96-1.84 (m, CH<sub>2</sub>CH<sub>2</sub>CH<sub>2</sub>, 2H). The *bis*-hydrochloride salt was obtained as follows: A portion of the crude product (35 mg, 0.11 mmol) was dissolved in anhydrous ethanol (0.75 mL). Anhydrous HCl in ethanol (0.067 mL of 3.5M HCl; 0.23 mmol) was added. The salt was then precipitated by addition of anhydrous Et<sub>2</sub>O and recrystallized from ethanol/Et<sub>2</sub>O/EtOAc (Et<sub>2</sub>O:EtOAc = 1:1). The resulting tan crystalline powder (13.1 mg) was quite hygroscopic, quickly becoming sticky in air but reverting to a free-flowing powder under argon. ESI-MS (M+H)<sup>+</sup>: 331.3.

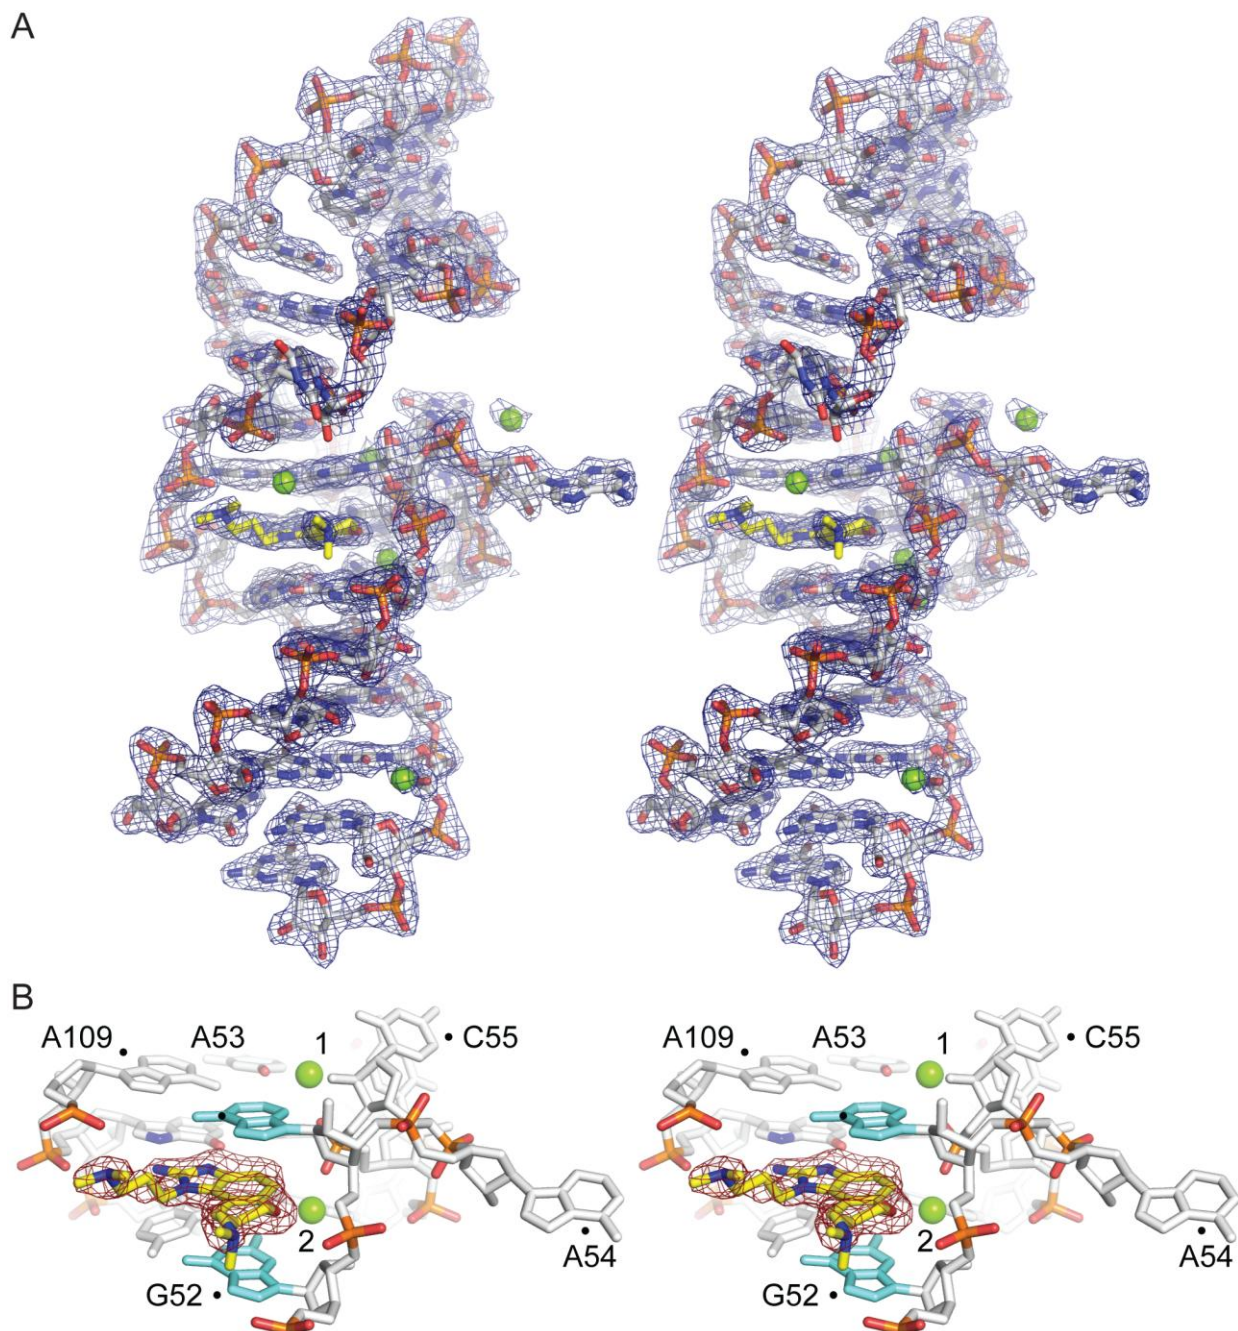

**Fig. S1.** Stereo view of the subdomain IIa RNA in complex with the benzimidazole ligand. (A) Overall structure overlaid with a 2Fo-Fc electron density map contoured at  $1\sigma$ . The ligand is shown in yellow, magnesium ions in green. (B) Detail view of the ligand binding site. Overlaid on the ligand is a Fo-Fc electron density map contoured at  $3\sigma$ . The density map was calculated from experimental phases with the ligand omitted from the RNA complex model.

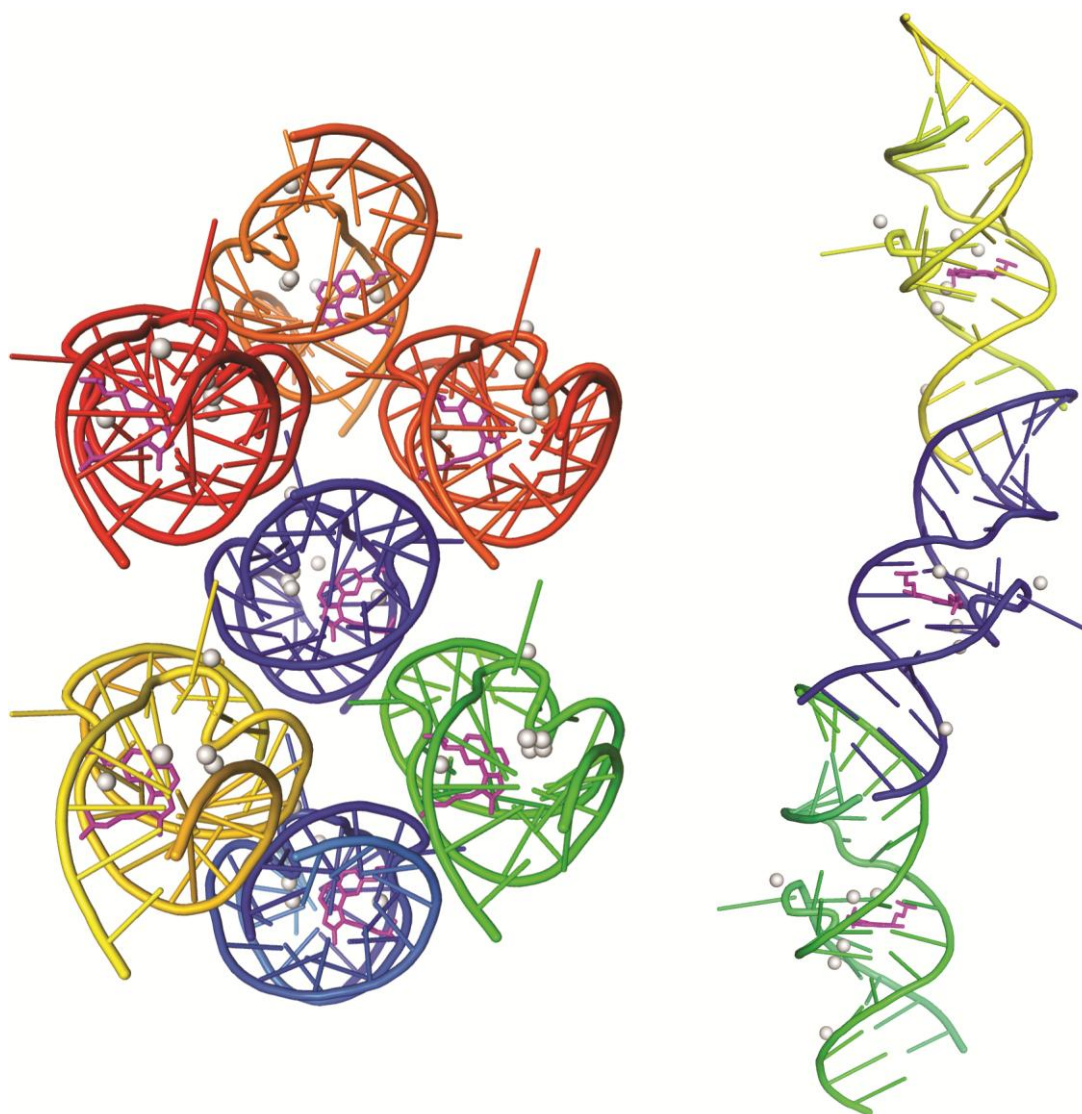

**Fig. S2.** Packing of the subdomain IIa ligand complex in the crystal lattice. Side-by-side packing of RNA helices does not involve contacts with the ligand binding pocket. Helices are stacked end-to-end to form a pseudo-continuous arrangement that is stabilized by intermolecular base pair formation between 3' overhang nucleotides in adjacent RNAs. The benzimidazole ligand **2** is shown in magenta.

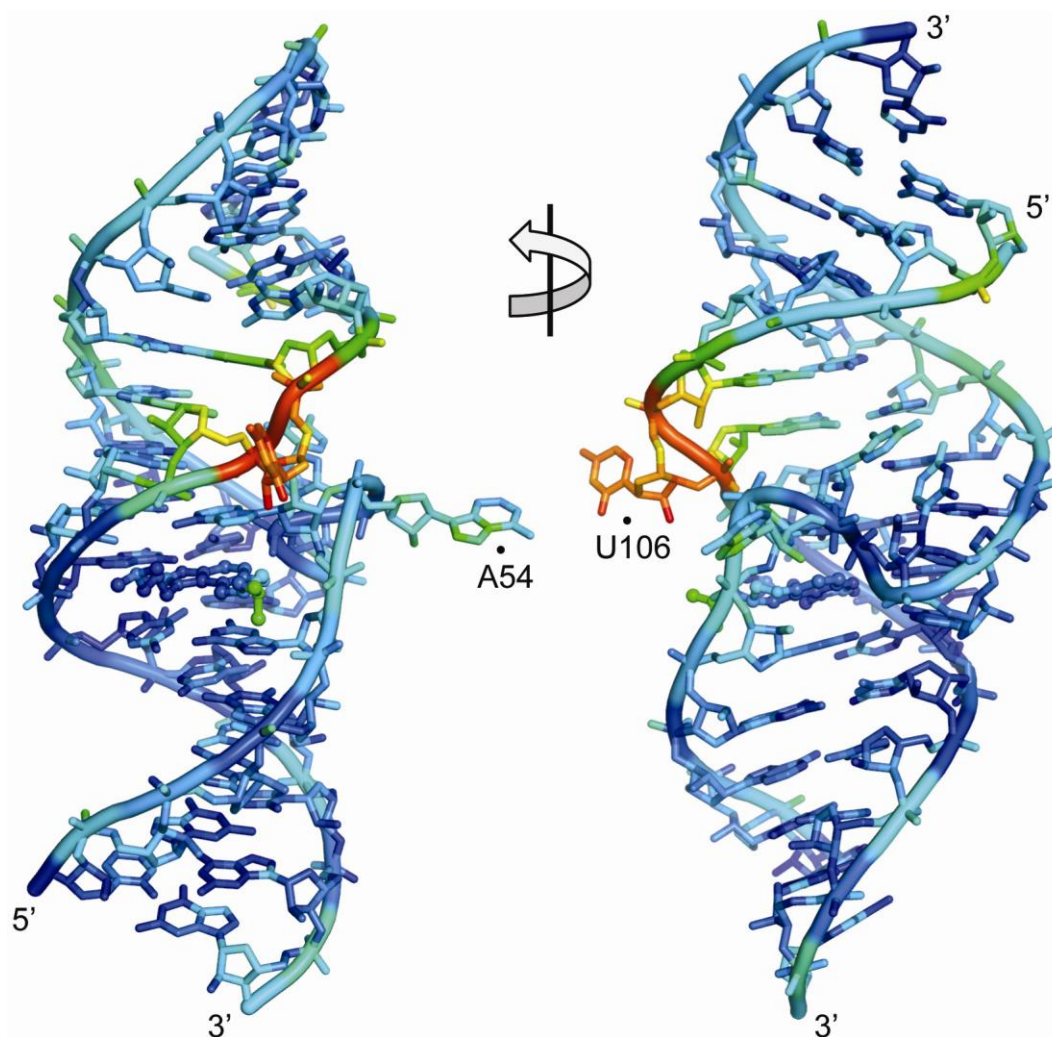

**Fig. S3.** Two views, rotated by 90, of the subdomain IIa ligand complex with B factors mapped as color coding on the structure (blue = low, red = high B factors). The benzimidazole ligand **2** is shown in ball-and-stick representation.

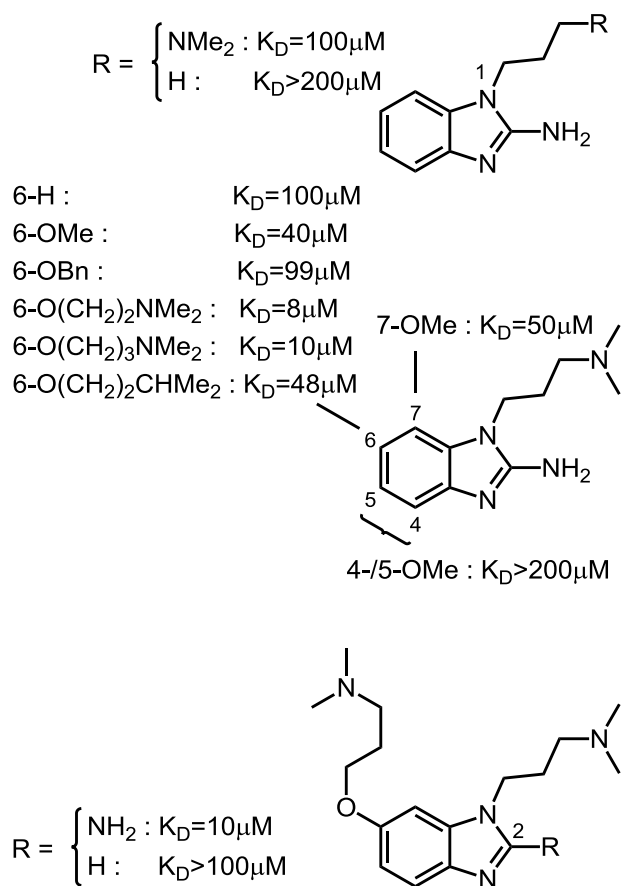

**Fig. S4.** Structure activity relationships of benzimidazole ligands of the subdomain IIa target.

Affinities ( $K_D$ ) were determined by a mass spectrometry assay for the IIa RNA (2).

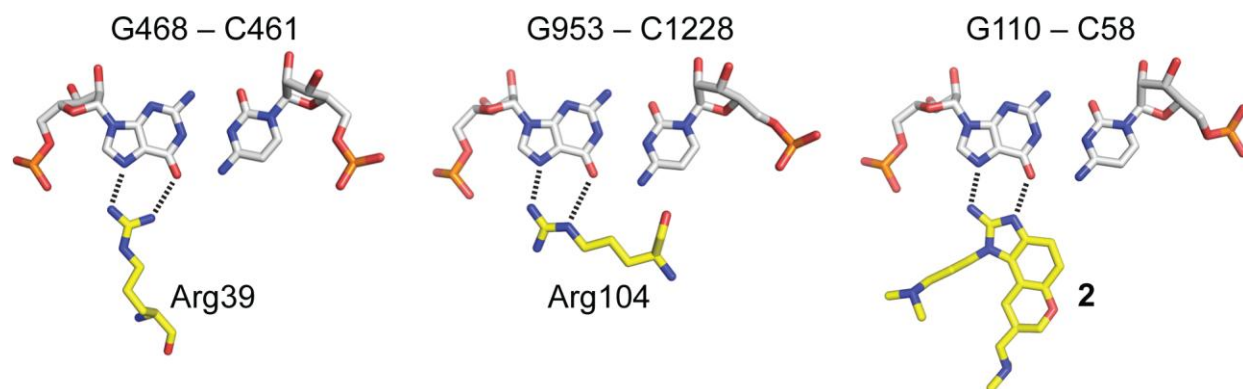

**Fig. S5.** Examples of Hoogsteen edge recognition of G-C pairs by arginine in the bacterial ribosome compared to the benzimidazole G110-C58 interaction in the subdomain IIa complex. Arg39 in ribosomal protein L34 binds at G468-C461 in the 23S rRNA; Arg104 in ribosomal protein S13 interacts with G953-C1228 in the 16S rRNA (3).



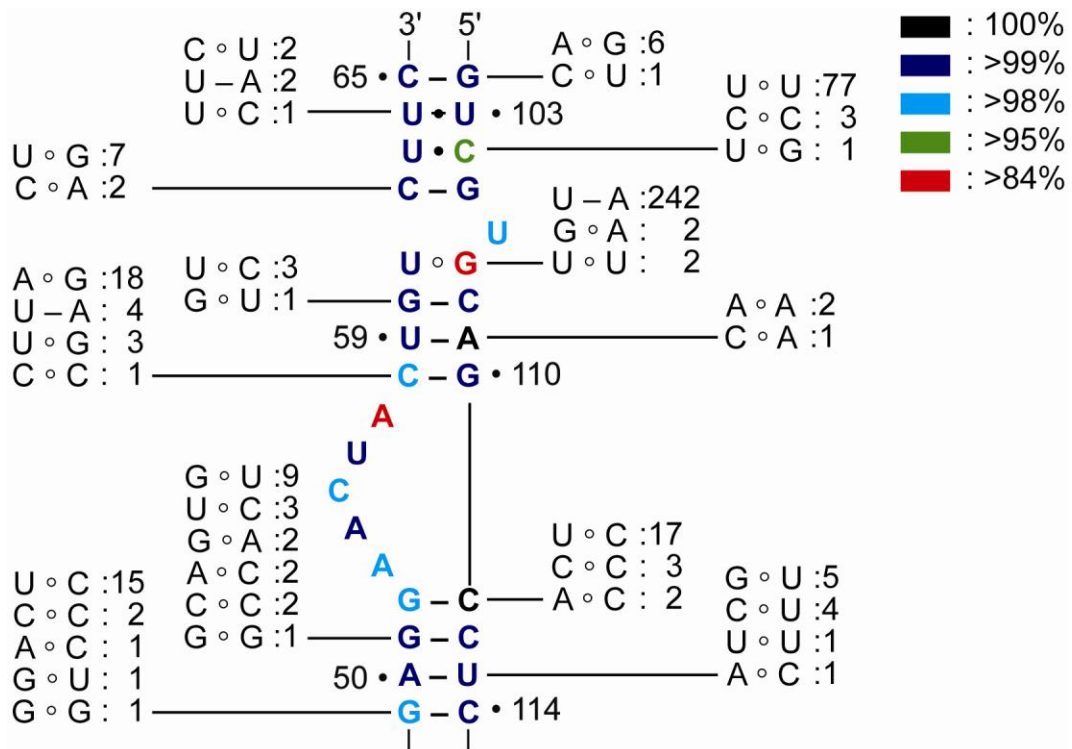

**Fig. S6.** Conservation of residues and base pairs in subdomain IIa. The conservation of residues, taken from Table S4, is shown in color coding. The occurrence of co-varying base substitutions is indicated for each pair. Conservation is uniform across all genotypes, except for the two lowest conserved residues, A57 and G107, in which the most prevalent polymorphisms occur predominantly in genotype 3 (U57) or all genotypes except 3 (A107). A total of 1,601 sequences from HCV clinical isolates were analyzed (4).

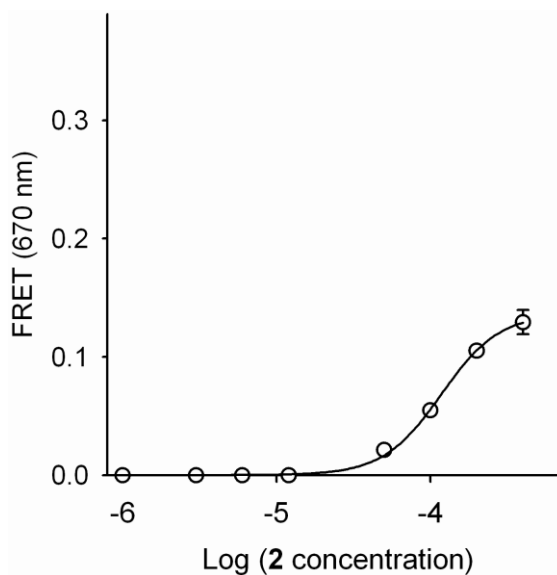

**Fig. S7.** FRET signal for titrations of Cy3/Cy5-labelled Ila RNA with benzimidazole **2** in the absence of  $\text{Mg}^{2+}$ . Fitting of a dose-response curve resulted in an  $\text{EC}_{50}$  value for the FRET signal increase of  $117 \pm 8 \mu\text{M}$ . Error bars represent  $\pm 1$  SD calculated from triplicate experiments. Note that the final state (FRET signal = 0.13) does not correspond to the completely folded state of the RNA in the presence of  $\text{Mg}^{2+}$  (FRET signal  $> 0.3$ ; see Figure S8 and ref. (5)).

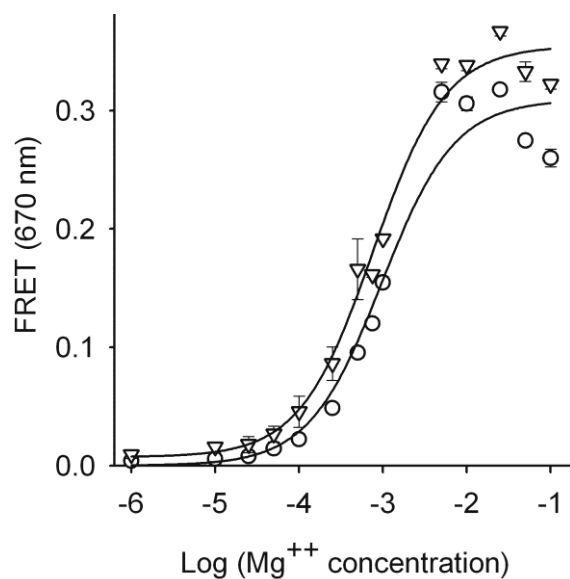

**Fig. S8.** FRET signal in a titration of Cy3/Cy5-labeled subdomain IIa RNA double mutants with  $Mg^{2+}$ , C58G/G110C (○) and C58U/G110A (◻), demonstrating proficiency of the mutant RNA to fold into the L-shaped IIa architecture. Fitting of dose-response curves resulted in an  $EC_{50}$  value for  $Mg^{2+}$  binding of  $970 \pm 140 \mu M$  (C58G/G110C) and  $760 \pm 90 \mu M$  (C58U/G110A). Error bars represent  $\pm 1$  SD calculated from triplicate experiments. In comparison, folding of the wt RNA occurred by  $Mg^{2+}$  binding with an  $EC_{50}$  value of  $375 \pm 140 \mu M$  (5). Error bars represent  $\pm 1$  SD calculated from triplicate experiments.

**Table S1. Oligonucleotides used for experiments.**

| <b>Oligonucleotide</b>                   | <b>Sequence</b>                               |
|------------------------------------------|-----------------------------------------------|
| <b>Crystallization:</b>                  |                                               |
| Ila left strand                          | 5' CGA GGA ACU ACU GUC UUC CC                 |
| Ila right strand                         | 5' GGU CGU GCA GCC UCG G                      |
| <b>2AP Fluorescence Experiments:</b> (6) |                                               |
| Ila left strand                          | 5' CGG AGG A[2AP]C UAC UGU CUU CAC GCC        |
| Ila right strand                         | 5' GCG UGU CGU GCA GCC UCC GG                 |
| <b>FRET Experiments:</b> (5)             |                                               |
| Ila left strand                          | 5' [Cy3]-UCG GAG GAA CUA CUG UCU UCA CGC<br>C |
| Ila right strand                         | 5' [Cy5]-UGC GUG UCG UGC AGC CUC CGG          |

**Table S2. Crystallographic data collection and refinement statistics for the HCV IRES subdomain IIa benzimidazole complex.**

| <b>Data Collection</b>                  |                                               |
|-----------------------------------------|-----------------------------------------------|
| Wavelength (Å)                          | 1.54                                          |
| High-resolution limit (Å)               | 2.2                                           |
| Low-resolution limit (Å)                | 16.8                                          |
| Redundancy <sup>a</sup>                 | 6.7 (4.5)                                     |
| Completeness (%) <sup>a</sup>           | 99.15 (75.6)                                  |
| $I/\sigma(I)$ <sup>a</sup>              | 32.5 (6.0)                                    |
| Total reflections                       | 31264                                         |
| Unique reflections                      | 4664                                          |
| <b>Refinement</b>                       |                                               |
| Space group                             | P2 <sub>1</sub> 2 <sub>1</sub> 2 <sub>1</sub> |
| Cell dimensions (Å)                     |                                               |
| <i>a</i>                                | 32.05                                         |
| <i>b</i>                                | 33.58                                         |
| <i>c</i>                                | 81.05                                         |
| α                                       | 90                                            |
| β                                       | 90                                            |
| γ                                       | 90                                            |
| $R_{work}/R_{free}$                     | 0.18 / 0.24                                   |
| No. atoms                               |                                               |
| RNA atoms                               | 757                                           |
| Anions                                  | 3 SO <sub>4</sub> <sup>2-</sup>               |
| Ligand                                  | 24                                            |
| Solvent atoms                           | 81                                            |
| Metal ions                              | 6 Mg <sup>2+</sup>                            |
| Mean <i>B</i> factors (Å <sup>2</sup> ) |                                               |
| RNA                                     | 27.1                                          |
| Anions                                  | 52.7                                          |
| Ligand                                  | 25.0                                          |
| Solvent                                 | 29.4                                          |
| Metal                                   | 34.1                                          |
| R.m.s. deviations                       |                                               |
| Bond lengths (Å)                        | 0.006                                         |
| Bond angles (°)                         | 0.878                                         |
| Dihedral angles (°)                     | 17.72                                         |

<sup>a</sup>Numbers in parentheses are for the highest-resolution shell.

**Table S3. Hydrogen bonds and metal coordination around the ligand binding site in the subdomain IIa benzimidazole complex.**

| <b>Residue 1</b> |     | <b>Residue 2</b> |     | <b>Distance (Å)</b> |
|------------------|-----|------------------|-----|---------------------|
| A53              | N3  | C55              | O2' | 2.87                |
| A53              | N1  | A109             | N6  | 2.91                |
| C55              | OP2 | U56              | O2' | 2.55                |
| U56              | O1P | C58              | N4  | 2.93                |
| A57              | N1  | C111             | O2' | 2.52                |
| A57              | N6  | C111             | O2  | 2.92                |
| U56              | O1P | Mg1              |     | 2.55                |
| U59              | O4  | Mg1              |     | 2.78                |
| U56              | OP2 | Mg2              |     | 2.70                |
| A57              | N7  | Mg2              |     | 2.81                |
| A53              | N7  | Mg3              |     | 2.86                |
| C108             | OP2 | Mg3              |     | 2.81                |
| G110             | N7  | ligand 2         | N2  | 2.70                |
| G110             | O6  | ligand 2         | N3  | 2.69                |
| A109             | OP2 | ligand 2         | N16 | 2.57                |

**Table S4. Conservation of residues in the subdomain IIa.\***

| <b>Residue</b> | <b>A</b>         | <b>C</b> | <b>G</b> | <b>U</b>          | <b>Residue</b> | <b>A</b>          | <b>C</b> | <b>G</b> | <b>U</b>         |
|----------------|------------------|----------|----------|-------------------|----------------|-------------------|----------|----------|------------------|
| <b>65</b>      | 0.4 <sup>1</sup> | 99.6     | 0.0      | 0.0               | <b>102</b>     | 0.0               | 0.0      | 99.9     | 0.1              |
| <b>64</b>      | 0.0              | 0.1      | 0.0      | 99.9              | <b>103</b>     | 0.1               | 0.1      | 0.0      | 99.8             |
| <b>63</b>      | 0.0              | 0.2      | 0.0      | 99.8              | <b>104</b>     | 0.0               | 95.1     | 0.1      | 4.8 <sup>3</sup> |
| <b>62</b>      | 0.0              | 99.6     | 0.0      | 0.4               | <b>105</b>     | 0.1               | 0.0      | 99.9     | 0.0              |
|                |                  |          |          |                   | <b>106</b>     | 0.9 <sup>4</sup>  | 0.4      | 0.1      | 98.6             |
| <b>61</b>      | 0.0              | 0.0      | 0.1      | 99.9              | <b>107</b>     | 15.3 <sup>5</sup> | 0.0      | 84.6     | 0.1              |
| <b>60</b>      | 0.0              | 0.0      | 99.8     | 0.2               | <b>108</b>     | 0.0               | 99.9     | 0.0      | 0.1              |
| <b>59</b>      | 0.1              | 0.1      | 0.0      | 99.8              | <b>109</b>     | 100.0             | 0.0      | 0.0      | 0.0              |
| <b>58</b>      | 1.1              | 98.4     | 0.0      | 0.4               | <b>110</b>     | 0.2               | 0.1      | 99.7     | 0.0              |
| <b>57</b>      | 84.6             | 0.3      | 0.1      | 15.1 <sup>2</sup> |                |                   |          |          |                  |
| <b>56</b>      | 0.1              | 0.2      | 0.3      | 99.4              |                |                   |          |          |                  |
| <b>55</b>      | 0.1              | 98.3     | 0.2      | 1.4               |                |                   |          |          |                  |
| <b>54</b>      | 99.8             | 0.0      | 0.1      | 0.2               |                |                   |          |          |                  |
| <b>53</b>      | 98.7             | 0.2      | 0.9      | 0.2               |                |                   |          |          |                  |
| <b>52</b>      | 0.1              | 0.2      | 98.6     | 1.1               | <b>111</b>     | 0.0               | 100.0    | 0.0      | 0.0              |
| <b>51</b>      | 0.1              | 0.1      | 99.6     | 0.2               | <b>112</b>     | 0.1               | 99.3     | 0.1      | 0.6              |
| <b>50</b>      | 99.4             | 0.2      | 0.3      | 0.1               | <b>113</b>     | 0.0               | 0.1      | 0.0      | 99.9             |
| <b>49</b>      | 0.1              | 0.1      | 98.9     | 0.9               | <b>114</b>     | 0.0               | 99.9     | 0.1      | 0.1              |

\*Total 1,601 sequences from the HCV database of clinical isolates (4); 0.1% corresponds to occurrence in maximally 2 sequences.

<sup>1</sup>genotype 1b only

<sup>2</sup>predominantly genotype 3

<sup>3</sup>genotypes 1, 2, 4, 6 only

<sup>4</sup>genotype 5 only

<sup>5</sup>all genotypes except 3

## Supporting Information References

1. Parker MA, Satkiewicz E, Hermann T, & Bergdahl BM (2011) An efficient new route to dihydropyranobenzimidazole inhibitors of HCV replication. *Molecules* 16(1):281-290.
2. Seth PP, *et al.* (2005) SAR by MS: discovery of a new class of RNA-binding small molecules for the hepatitis C virus: internal ribosome entry site IIA subdomain. *J Med Chem* 48(23):7099-7102.
3. Selmer M, *et al.* (2006) Structure of the 70S ribosome complexed with mRNA and tRNA. *Science* 313(5795):1935-1942.
4. Kuiken C, Hraber P, Thurmond J, & Yusim K (2008) The hepatitis C sequence database in Los Alamos. *Nucleic Acids Res* 36(Database issue):D512-516.
5. Parsons J, *et al.* (2009) Conformational inhibition of the hepatitis C virus internal ribosome entry site RNA. *Nat Chem Biol* 5(11):823-825.
6. Dibrov SM, Johnston-Cox H, Weng YH, & Hermann T (2007) Functional architecture of HCV IRES domain II stabilized by divalent metal ions in the crystal and in solution. *Angew Chem Int Ed Engl* 46(1-2):226-229.
